# Supplementary material for: Tunable and ultra-stable UV light-switchable fluorescent composites for information hiding and storage
Source: Royal Society of Chemistry journal article supplement (doi:10.1039/c8dt02475h), 2018-01-01
Supplement: c8dt02475h1.pdf [file c8dt02475h1.pdf]

## Supporting Information

# Tunable And Ultra-Stable UV Lights-Switchable Fluorescent Composites For Information Hiding And Storage

*Mengxiao Li,<sup>1</sup> Yu Feng,<sup>1</sup> Qingyong Tian,<sup>1</sup> Weijing Yao,<sup>1</sup> Li Liu,<sup>1</sup> Xuan Li,<sup>1</sup> Huanjun Wang<sup>1</sup> and Wei  
Wu<sup>\*1,2,3</sup>*

<sup>1</sup>Laboratory of Printable Functional Nanomaterials and Printed Electronics, School of Printing and  
Packaging, Wuhan University, Wuhan 430072, P. R. China;

<sup>2</sup>National & Local Joint Engineering Research Center of Advanced Packaging Materials Developing  
Technology, Hunan University of Technology, Zhuzhou 412007, P. R. China;

<sup>3</sup>Shenzhen Research Institute of Wuhan University, Shenzhen 518057, P. R. China

Email address:

Wei Wu: [weiwu@whu.edu.cn](mailto:weiwu@whu.edu.cn) (Corresponding author)

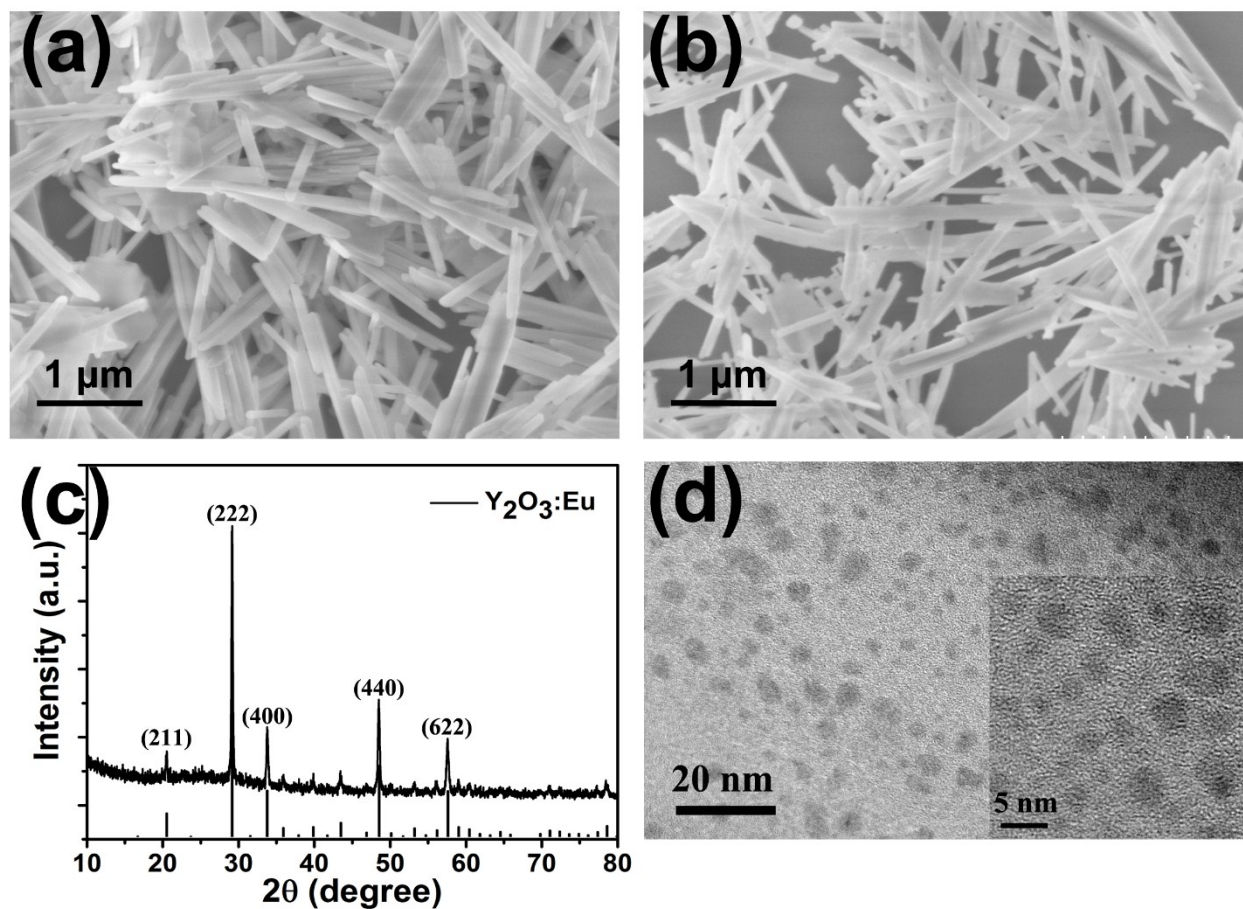

**Figure S1** SEM images of sample before (a) and after (b) annealing, XRD image of Y<sub>2</sub>O<sub>3</sub>: Eu sample annealed at 1000 °C for 4h (c), and TEM image of CDs (inset: HRTEM image) (d).

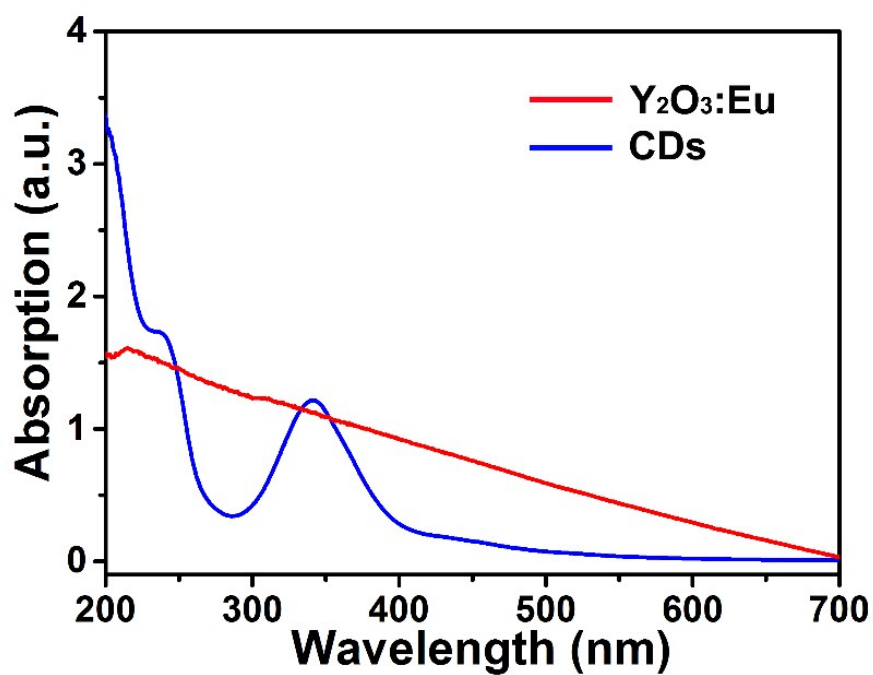

Figure S2 Absorption spectra of  $\text{Y}_2\text{O}_3:\text{Eu}$  and CDs solution.

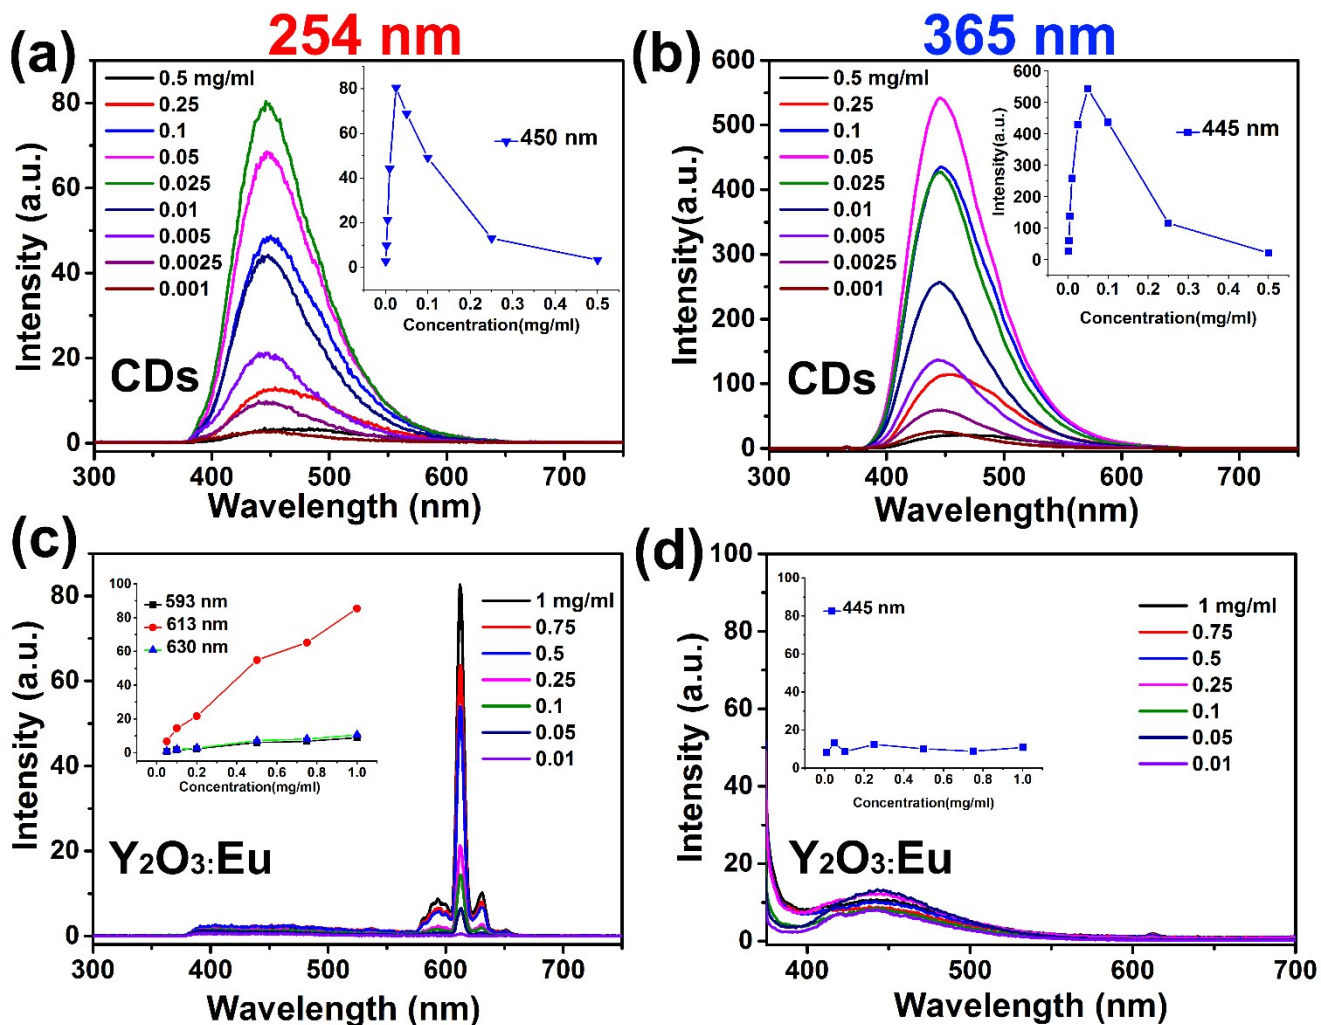

Figure S3 Fluorescent spectra of CDs and  $\text{Y}_2\text{O}_3:\text{Eu}$  at low concentration under 254 nm and 365 nm excitation, respectively (inset: the line charts show peak intensity change with the increasing concentration).

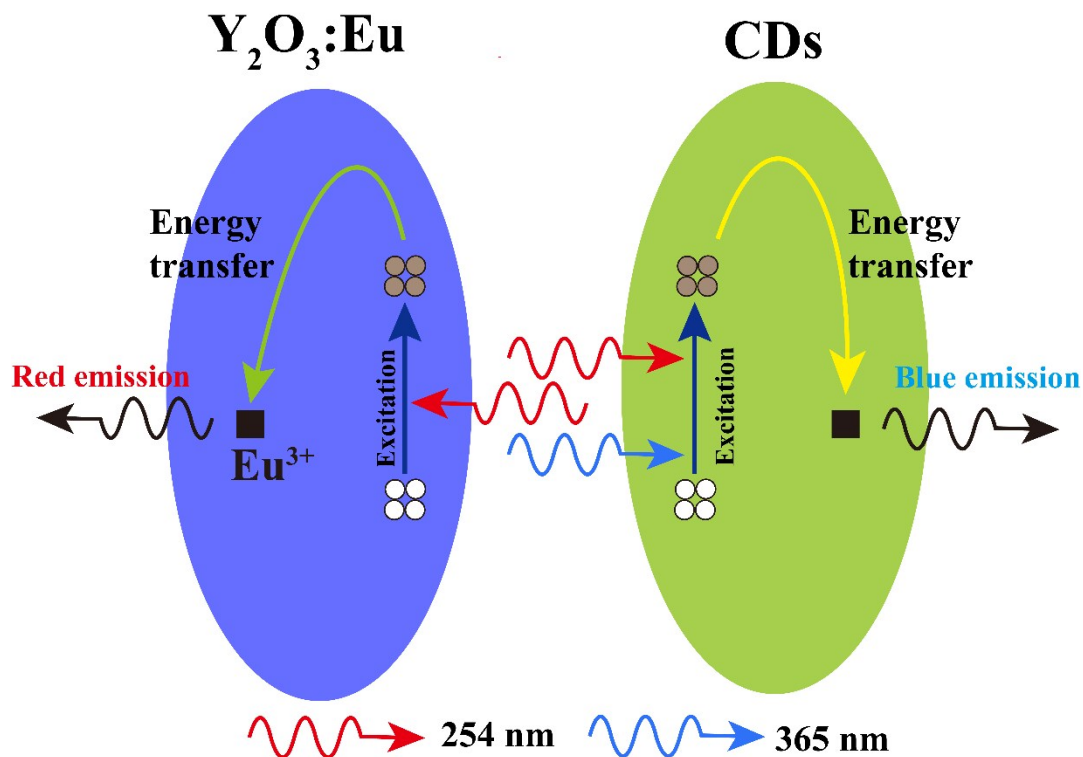

**Figure S4** The brief mechanism diagrams of Y<sub>2</sub>O<sub>3</sub>: Eu and CDs.

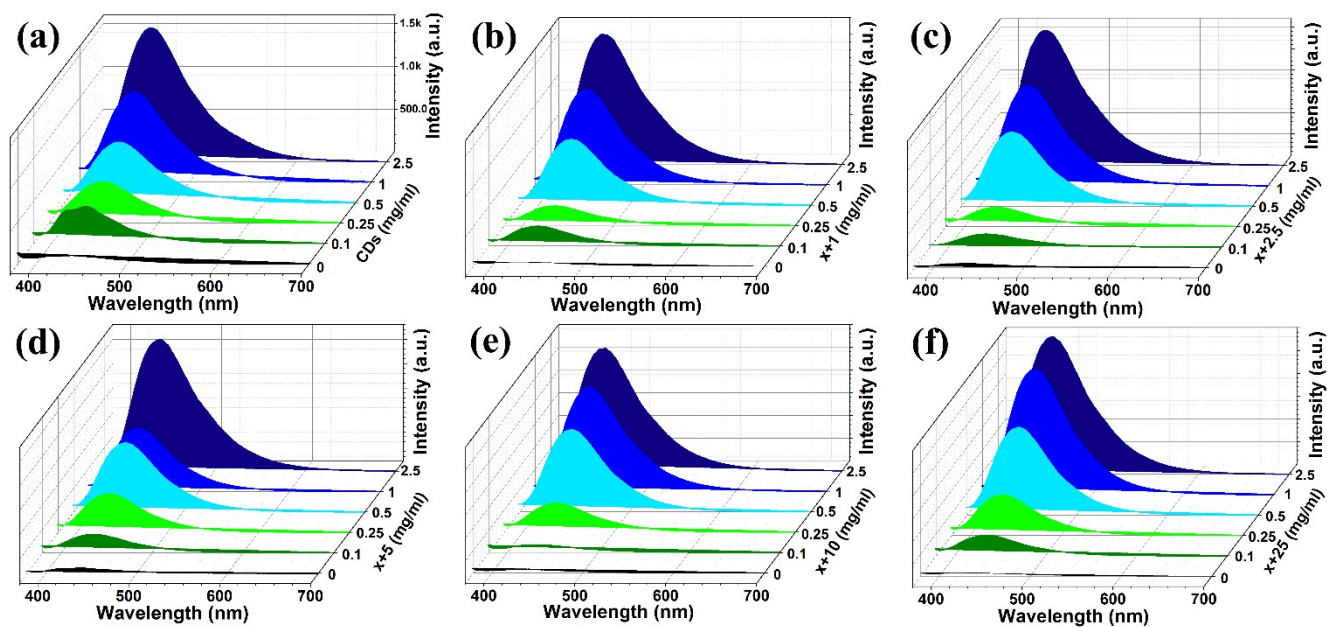

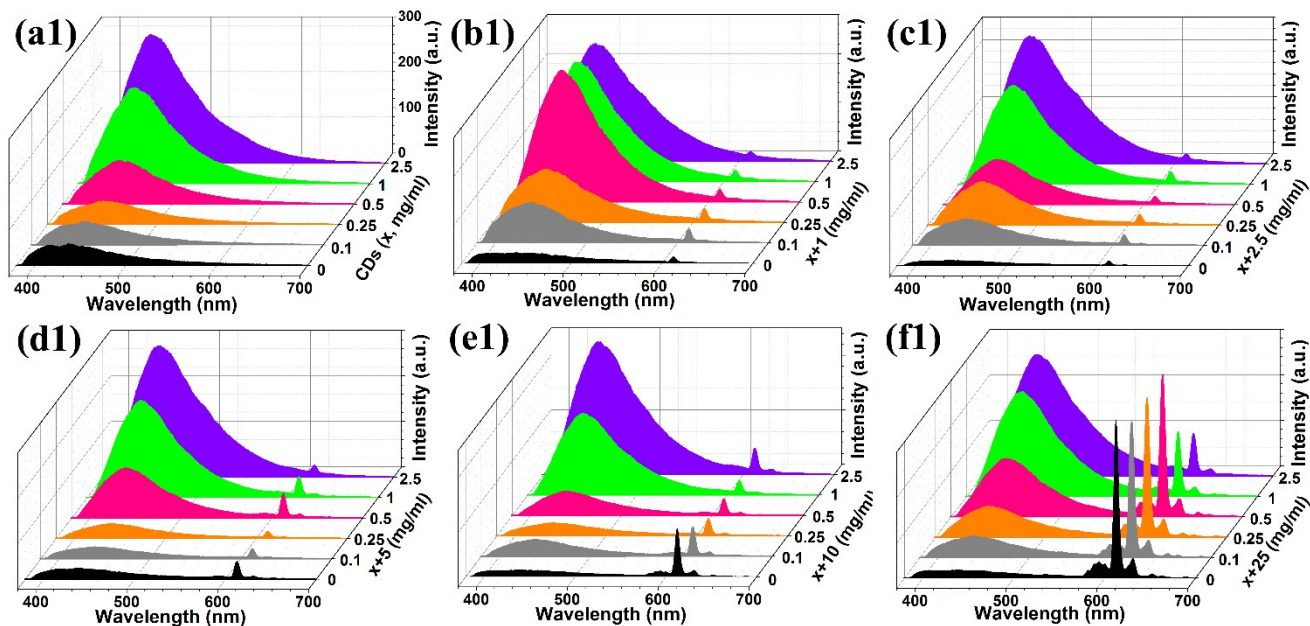

**Figure S5** Measured fluorescent spectrum of the multicolor blocks printed on paper under 365 nm excitation (a-f) and 254 nm excitation (a1-f1). The graphs of **a**, **a1** is corresponding to the images of the first line in **Figure 2a**, **b**, respectively. **b**, **b1** to the second line, **c**, **c1** to the third line, **d**, **d1** to the fourth line, **e**, **e1** to the fifth line, and **f**, **f1** to the sixth line.

| 365 nm  |        |       |          |        |      |          |        |       |          |        |       |          |        |       |          |        |       |
|---------|--------|-------|----------|--------|------|----------|--------|-------|----------|--------|-------|----------|--------|-------|----------|--------|-------|
| CIE xyY |        |       | CIE xyY2 |        |      | CIE xyY3 |        |       | CIE xyY4 |        |       | CIE xyY5 |        |       | CIE xyY6 |        |       |
| 0.3215  | 0.3226 | 1.71  | 0.1515   | 0.1559 | 4.11 | 0.1440   | 0.1525 | 6.29  | 0.1672   | 0.1849 | 15.52 | 0.2074   | 0.2249 | 23.44 | 0.2368   | 0.2645 | 34.26 |
| 0.3262  | 0.3264 | 1.82  | 0.1503   | 0.1542 | 4.42 | 0.1412   | 0.1474 | 6.80  | 0.2041   | 0.2178 | 21.87 | 0.2417   | 0.2680 | 35.60 | 0.2657   | 0.3236 | 56.43 |
| 0.3293  | 0.3311 | 1.72  | 0.1476   | 0.1530 | 4.76 | 0.2055   | 0.2182 | 21.95 | 0.1985   | 0.2107 | 20.35 | 0.2368   | 0.2593 | 32.79 | 0.2549   | 0.2999 | 47.48 |
| 0.3251  | 0.3254 | 1.69  | 0.1489   | 0.1551 | 4.60 | 0.1527   | 0.1636 | 11.90 | 0.2176   | 0.2317 | 25.14 | 0.2447   | 0.2717 | 36.95 | 0.2565   | 0.3038 | 48.91 |
| 0.3227  | 0.3224 | 1.72  | 0.1403   | 0.1431 | 7.33 | 0.1412   | 0.1466 | 6.87  | 0.2148   | 0.2275 | 24.12 | 0.2464   | 0.2753 | 38.09 | 0.2483   | 0.2801 | 39.74 |
| 0.3102  | 0.3120 | 1.80  | 0.1493   | 0.1541 | 4.80 | 0.1521   | 0.1618 | 11.70 | 0.2240   | 0.2394 | 27.10 | 0.2336   | 0.2540 | 31.00 | 0.2413   | 0.2662 | 34.75 |
| 254 nm  |        |       |          |        |      |          |        |       |          |        |       |          |        |       |          |        |       |
| CIE xyY |        |       | CIE xyY2 |        |      | CIE xyY3 |        |       | CIE xyY4 |        |       | CIE xyY5 |        |       | CIE xyY6 |        |       |
| 0.3844  | 0.3869 | 1.24  | 0.2709   | 0.2719 | 2.31 | 0.2101   | 0.2269 | 3.46  | 0.1555   | 0.1765 | 6.01  | 0.1582   | 0.1822 | 7.21  | 0.1870   | 0.2170 | 17.75 |
| 0.2418  | 0.2154 | 8.58  | 0.2328   | 0.2316 | 2.66 | 0.2549   | 0.2554 | 2.29  | 0.1452   | 0.1541 | 5.90  | 0.1416   | 0.1525 | 7.93  | 0.1837   | 0.2091 | 19.04 |
| 0.2601  | 0.2070 | 10.11 | 0.2357   | 0.2288 | 2.45 | 0.1465   | 0.1504 | 8.17  | 0.2078   | 0.2185 | 22.00 | 0.1420   | 0.1521 | 7.48  | 0.1677   | 0.1942 | 15.03 |
| 0.3519  | 0.2553 | 31.10 | 0.2389   | 0.2133 | 3.90 | 0.1804   | 0.1802 | 3.68  | 0.1725   | 0.1773 | 13.57 | 0.1905   | 0.2004 | 18.26 | 0.2314   | 0.2531 | 30.87 |
| 0.4243  | 0.2880 | 20.17 | 0.2978   | 0.2130 | 6.12 | 0.2671   | 0.2132 | 5.86  | 0.1835   | 0.1758 | 5.44  | 0.1553   | 0.1652 | 4.29  | 0.1511   | 0.1693 | 9.17  |
| 0.6127  | 0.3431 | 11.08 | 0.5346   | 0.3078 | 7.31 | 0.4426   | 0.2726 | 14.24 | 0.3964   | 0.2486 | 12.70 | 0.2125   | 0.1933 | 14.29 | 0.1790   | 0.1902 | 13.62 |

**Figure S6** Measured CIE xyY data of color blocks in **Figure 3**, and the corresponding CIE coordinates of color blocks in each line.

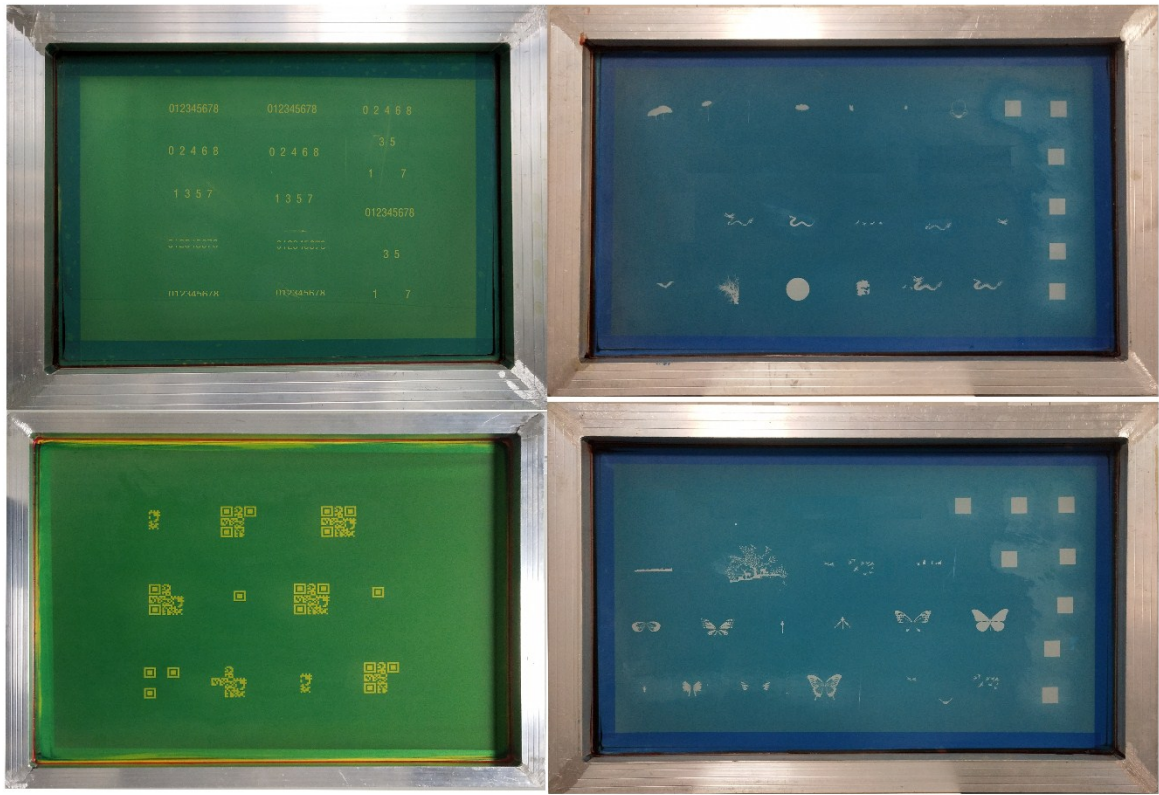

**Figure S7** The photograph of screen printing plates.
